# Supplementary material for: Solvent-induced luminescence behavior of NH2-MIL-53(Fe) in H2O and D2O: a potential approach for D2O detection
Source: Royal Society of Chemistry journal article supplement (doi:10.1039/d3cc02635c), 2023-01-01
Supplement: d3cc02635c1.pdf [file d3cc02635c1.pdf]

## Electronic Supplementary Information for

### Solvent-induced luminescence of NH<sub>2</sub>-MIL-53(Fe) in H<sub>2</sub>O and D<sub>2</sub>O: a potential approach for D<sub>2</sub>O detection

Zhiqiang Guo,<sup>a</sup> Xiaoxuan Fan,<sup>a</sup> Xiaokun Wen,<sup>b</sup> Wen Liu,<sup>a</sup> Baijie Guan,<sup>a</sup> Xia hong,<sup>b</sup> Kexin Wang,<sup>\*a</sup>  
Jiwei Wang,<sup>\*a</sup>

<sup>a</sup> College of Physics, Liaoning University, Shenyang, 110036, China

<sup>b</sup> Key Laboratory of UV-Emitting Materials and Technology (Northeast Normal University),  
Ministry of Education, Changchun, 130024, China

#### Chemicals

FeCl<sub>3</sub>·6H<sub>2</sub>O, 2-aminoterephthalic acid (NH<sub>2</sub>-H<sub>2</sub>BDC), p-phthalic acid (H<sub>2</sub>BDC) and N,N-Dimethylformamide (DMF) were purchased from Macklin Reagent Co, Ltd. D<sub>2</sub>O was purchased from Aladdin Reagent Co, Ltd. Deionized water (18 MΩ·cm<sup>-1</sup>) was used in all aqueous solutions. All of the above chemicals were used without further purification.

#### Preparation of NH<sub>2</sub>-MIL-53(Fe)

The NH<sub>2</sub>-MIL-53(Fe) was prepared according to the reported hydrothermal method.<sup>1,2</sup> NH<sub>2</sub>-H<sub>2</sub>BDC (1.45 g) and FeCl<sub>3</sub>·6H<sub>2</sub>O (2.16 g) were firstly dissolved in DMF (80 mL) by ultrasonic. Next the solution was shifted into a hydrothermal reacted vessel and placed at 155 °C for 72 h. The reaction solution was left undisturbed at room temperature for 24 h. The precipitate was separated by centrifugation and washed by DMF for 3 times. They were dried in the vacuum at 80 °C for 24 h to obtain the reddish-brown powder of NH<sub>2</sub>-MIL-53(Fe).

#### Preparation of MIL-53(Fe)

The MIL-53(Fe) was prepared according to the reported hydrothermal method.<sup>1,2</sup> H<sub>2</sub>BDC (1.33 g) and FeCl<sub>3</sub>·6H<sub>2</sub>O (2.16 g) were firstly dissolved in DMF (80 mL) by ultrasonic. Next the solution was shifted into a hydrothermal reacted vessel and placed at 155 °C for 72 h. The reaction solution was left undisturbed at room temperature for 24 h. The precipitate was separated by centrifugation and washed by DMF for 3 times. They were dried in the vacuum at 80 °C for 24 h to obtain the dark-brown powder of MIL-53(Fe).

## Characterization

The morphology of NH<sub>2</sub>-MIL-53(Fe) was characterized by the scanning electron microscope (SEM, Quanta, FEG-250). X-ray diffraction (XRD) data of NH<sub>2</sub>-MIL-53(Fe) and MIL-53(Fe) were tested by the Tongda TD-3500 automatic X-ray diffractometer system. Fourier transform infrared (FTIR) transmittance spectra of NH<sub>2</sub>-MIL-53(Fe) were characterized by the Nicolet IS10 spectrometer with an attenuated total reflection attachment (PIKE, ATR Max II). The fluorescence emission spectra were recorded on a Hitachi F-7000 fluorescence spectrometer under 297 nm excitation. The time-resolved spectra of NH<sub>2</sub>-MIL-53(Fe) in H<sub>2</sub>O and D<sub>2</sub>O were recorded using fluorescence spectrometer (Quanta Master 400, Photon Technology International).

### Excitation and emission spectra of NH<sub>2</sub>-MIL-53(Fe) and MIL-53(Fe) in solid state

The excitation and emission spectra of NH<sub>2</sub>-MIL-53(Fe) and MIL-53(Fe) in solid state are shown in Fig. S1 and S2. The powders of NH<sub>2</sub>-MIL-53(Fe) show three emission bands at 434, 446 and 456 nm under 361 nm excitation (Fig. S1a). The emission intensity is lower than the dispersion of NH<sub>2</sub>-MIL-53(Fe). Fig. S1 b, c and d are the excitation spectra of NH<sub>2</sub>-MIL-53(Fe) at 434, 446 and 456 nm in solid state. The powders of MIL-53(Fe) exhibit a strong emission performance comparing with the dispersion of MIL-53(Fe). Two emission bands are centered at 293 nm and 392 nm, respectively. Fig. S2 b and c are the excitation spectra of MIL-53(Fe) at 293 and 392 nm in solid state.

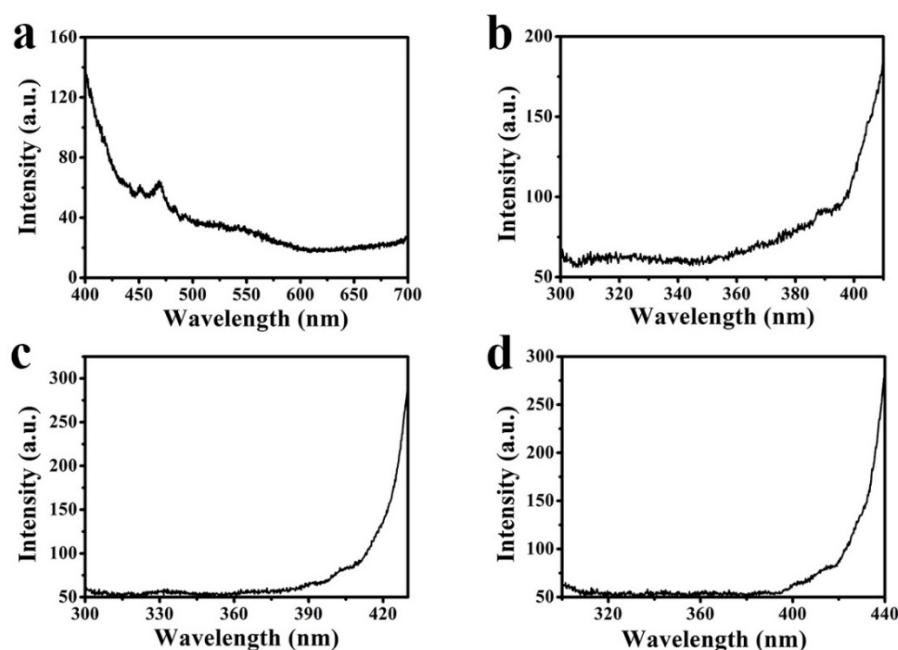

**Fig. S1** (a) The emission spectra of NH<sub>2</sub>-MIL-53(Fe) in solid state under the 361 nm excitation. (b)

The excitation spectra of NH<sub>2</sub>-MIL-53(Fe) in solid state at 434 nm. (c) The excitation spectra of NH<sub>2</sub>-MIL-53(Fe) in solid state at 446 nm. (d) The excitation spectra of NH<sub>2</sub>-MIL-53(Fe) in solid state at 456 nm.

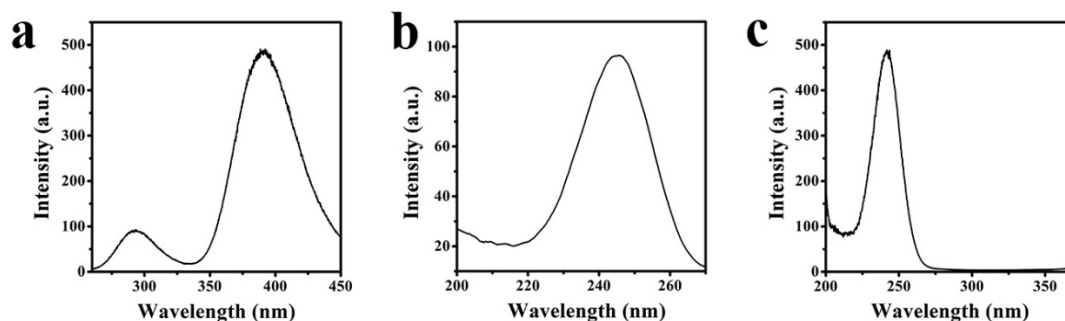

**Fig. S2** (a) The emission spectra of MIL-53(Fe) in solid state under the 241 nm excitation. (b) The excitation spectra of MIL-53(Fe) in solid state at 293 nm. (c) The excitation spectra of MIL-53(Fe) in solid state at 392 nm.

#### Emission spectra of NH<sub>2</sub>-MIL-53(Fe) in different solvent

The emission spectra of NH<sub>2</sub>-MIL-53(Fe) in H<sub>2</sub>O, D<sub>2</sub>O, acetone, cyclohexane, ethanol, isopropanol and methanol are shown in Fig. S3.

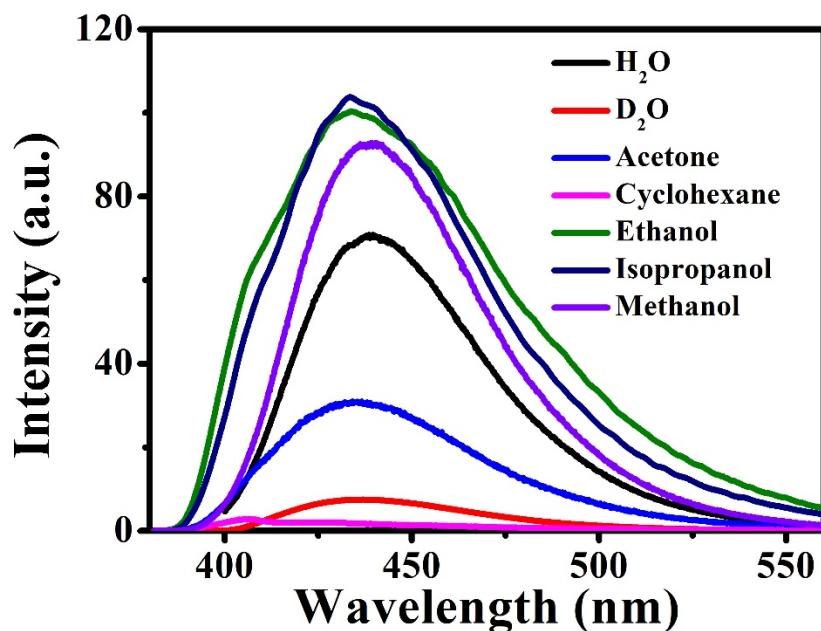

**Fig. S3** Emission spectra of NH<sub>2</sub>-MIL-53(Fe) in H<sub>2</sub>O, D<sub>2</sub>O, acetone, cyclohexane, ethanol, isopropanol and methanol under 361 nm excitation.

**Powder X-ray patterns and emission spectra of NH<sub>2</sub>-MIL-53(Fe) after immersed in H<sub>2</sub>O and D<sub>2</sub>O**

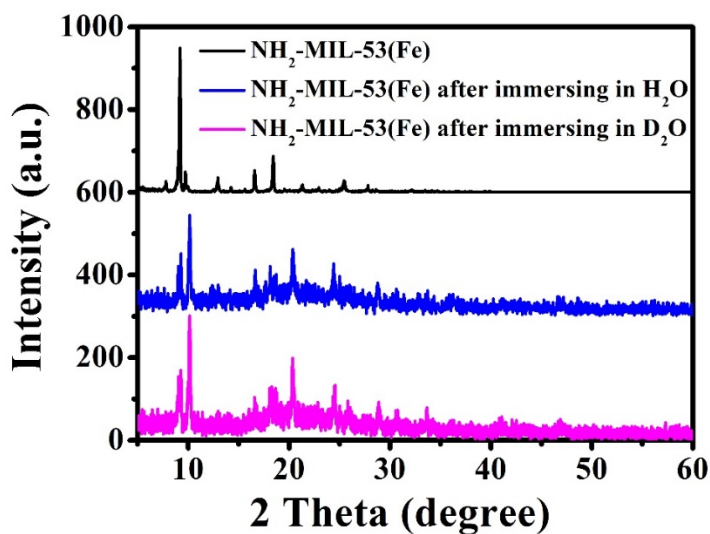

**Fig. S4** Powder X-ray patterns of NH<sub>2</sub>-MIL-53(Fe) after immersed in H<sub>2</sub>O and D<sub>2</sub>O

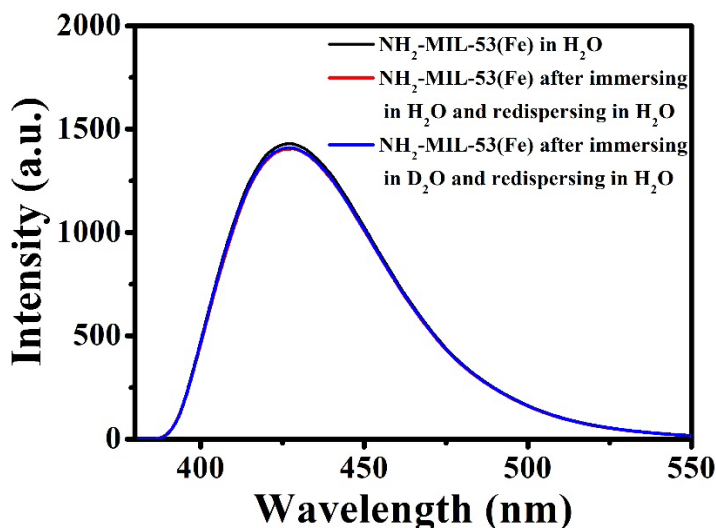

**Fig. S5** Emission spectra of NH<sub>2</sub>-MIL-53(Fe) dispersing in H<sub>2</sub>O, NH<sub>2</sub>-MIL-53(Fe) after immersing in H<sub>2</sub>O and redispersing in H<sub>2</sub>O and NH<sub>2</sub>-MIL-53(Fe) immersing in D<sub>2</sub>O and redispersing in H<sub>2</sub>O under 361 nm excitation.

#### Selectivity of NH<sub>2</sub>-MIL-53(Fe) for D<sub>2</sub>O detection

The selectivity of NH<sub>2</sub>-MIL-53(Fe) for D<sub>2</sub>O detection was evaluated. The emission intensity at 427 nm of NH<sub>2</sub>-MIL-53(Fe) dispersion (50% H<sub>2</sub>O and 50% D<sub>2</sub>O) is used as a blank value. The NH<sub>2</sub>-MIL-53(Fe) was dispersed in the mixture. The mixture contains common ions (Na<sup>+</sup>, K<sup>+</sup>, Ca<sup>2+</sup>, Mg<sup>2+</sup> and Zn<sup>2+</sup>) or miscible species (methanol, ethanol and acetone). The ion concentration is 1 mM. The volume ratio of miscible species is 50%.

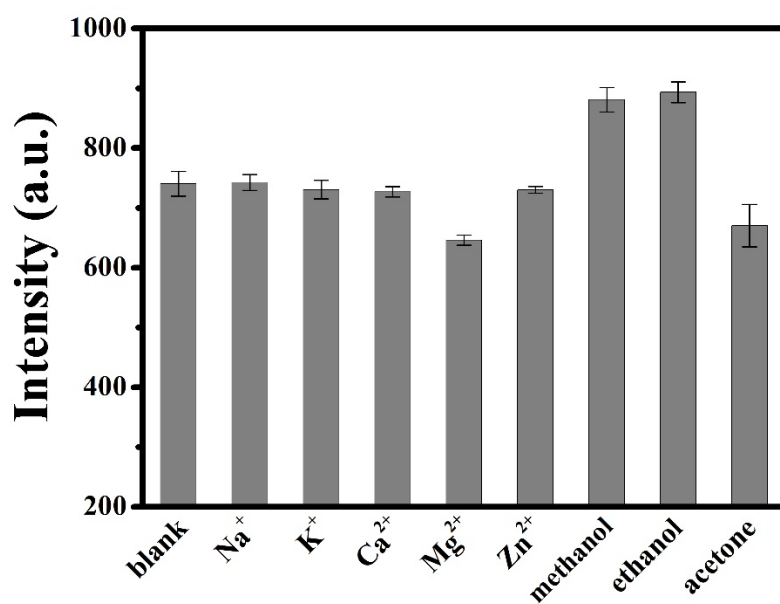

**Fig. S6** Emission intensity at 427 nm of NH<sub>2</sub>-MIL-53(Fe) dispersion in the presence of other common species (Na<sup>+</sup>, K<sup>+</sup>, Ca<sup>2+</sup>, Mg<sup>2+</sup>, Zn<sup>2+</sup>, methanol, ethanol and acetone). The dispersion contains 50% D<sub>2</sub>O. The ion concentration is 1 mM.
